# Supplementary material for: Design Features of Randomized Clinical Trials of Vitamin D and Falls: A Systematic Review
Source: PubMed Central journal article supplement (PMC6115709; doi:10.3390/nu10080964), 2018-07-26
Supplement: nutrients-10-00964-s001.pdf [file nutrients-10-00964-s001.pdf]

## APPENDIX

**Supplemental Table S1:** List of included Vitamin D and Falls Trials

|   | <b>Authors</b>   | <b>Publication year</b> | <b>Recruitment start year</b> | <b>Country</b>            | <b>Citation</b>                                                                                                                                                                                                                                                                                       |
|---|------------------|-------------------------|-------------------------------|---------------------------|-------------------------------------------------------------------------------------------------------------------------------------------------------------------------------------------------------------------------------------------------------------------------------------------------------|
| 1 | Graafmans et al. | 1996                    | 1992                          | Netherlands               | Graafmans WC, Ooms ME, Hofstee HMA, Bezemer PD, Bouter LM, Lips P. Falls in the Elderly: A Prospective Study of Risk Factors and Risk Profiles. <i>Am J Epidemiol.</i> 1996;143(11):1129-1136. doi:10.1093/oxfordjournals.aje.a008690.                                                                |
| 2 | Pfeifer et al.   | 2000                    | 1997                          | Germany                   | Pfeifer M, Begerow B, Minne HW, et al. Effects of a short-term vitamin D and calcium supplementation on body sway and secondary hyperparathyroidism in elderly women. <i>J Bone Min Res.</i> 2000;15(6):1113-1118. doi:10.1359/jbmr.2000.15.6.1113.                                                   |
| 3 | Bischoff et al.  | 2003                    | 1999                          | Switzerland               | Bischoff HA, Stahlein HB, Dick W, et al. Effects of Vitamin D and Calcium Supplementation on Falls: <i>J Bone Miner Res.</i> 2003;18(2):343-351.                                                                                                                                                      |
| 4 | Latham et al.    | 2003                    | 1999                          | New Zealand/<br>Australia | Latham N, Anderson CS, Lee A, Bennet DA, Moseley A, Cameron ID. A Randomized, Controlled Trial of Quadriceps Resistance Exercise and Vitamin D in Frail Older People: The Interventions Trial in Elderly Subjects (FITNESS). 2003:291-299.                                                            |
| 5 | Trivedi et al.   | 2003                    | 1996                          | UK                        | Trivedi DP, Doll R, Khaw KT. Effect of four monthly oral vitamin D3 (cholecalciferol) supplementation on fractures and mortality in men and women living in the community: randomised double blind controlled trial. <i>BMJ.</i> 2003;326(7387):469. doi:10.1136/bmj.326.7387.469.                    |
| 6 | Dhesi et al.     | 2004                    | 1999                          | UK                        | Dhesi JK, Jackson SHD, Bearne LM, et al. Vitamin D supplementation improves neuromuscular function in older people who fall. <i>Age Ageing.</i> 2004;33(6):589-595. doi:10.1093/ageing/afh209.                                                                                                        |
| 7 | Harwood et al.   | 2004                    | NR                            | UK                        | Harwood RH, Sahota O, Gaynor K, Masud T, Hosking DJ. A randomised, controlled comparison of different calcium and vitamin D supplementation regimens in elderly women after hip fracture: The Nottingham Neck of Femur (NoNOF) study. <i>Age Ageing.</i> 2004;33(1):45-51. doi:10.1093/ageing/afh002. |
| 8 | Flicker et al.   | 2005                    | 1996                          | Australia                 | Flicker L, MacInnis RJ, Stein MS, et al. Should older people in residential care receive vitamin D to prevent falls? Results of a randomized trial. <i>J Am Geriatr Soc.</i> 2005;53(11):1881-1888. doi:10.1111/j.1532-5415.2005.00468.x.                                                             |
| 9 | Grant et al.     | 2005                    | 1999                          | UK                        | The RECORD Trial Group. Oral vitamin D3 and calcium for secondary prevention of low-trauma fractures in elderly people (Randomised Evaluation of Calcium or vitamin D, RECORD): A randomised placebo-controlled trial. <i>Lancet.</i> 2005;365(9471):1621-1628. doi:10.1016/S0140-6736(05)63013-9.    |

|    |                         |      |      |                     |                                                                                                                                                                                                                                                                                                                           |
|----|-------------------------|------|------|---------------------|---------------------------------------------------------------------------------------------------------------------------------------------------------------------------------------------------------------------------------------------------------------------------------------------------------------------------|
| 10 | Porthouse et al.        | 2005 | 1999 | UK                  | Porthouse J, Cockayne S, King C, et al. Randomised controlled trial of calcium and supplementation with cholecalciferol (vitamin D3) for prevention of fractures in primary care. <i>BMJ</i> . 2005;330(7498):1003. doi:10.1136/bmj.330.7498.1003.                                                                        |
| 11 | Bischoff-Ferrari et al. | 2006 | NR   | USA                 | Bischoff-Ferrari HA, Orav EJ, Dawson-Hughes B. Effect of cholecalciferol plus calcium on falling in ambulatory older men and women: a 3-year randomized controlled trial. <i>Arch Intern Med</i> . 2006;166(4):424-430. doi:10.1016/S0084-3741(08)70160-4                                                                 |
| 12 | Broe et al.             | 2007 | 1995 | USA                 | Broe KE, Chen TC, Weinberg J, Bischoff-Ferrari HA, Holick MF, Kiel DP. A higher dose of vitamin D reduces the risk of falls in nursing home residents: A randomized, multiple-dose study. <i>J Am Geriatr Soc</i> . 2007;55(2):234-239. doi:10.1111/j.1532-5415.2007.01048.x.                                             |
| 13 | Burleigh et al.         | 2007 | NR   | UK                  | Burleigh E, McColl J, Potter J. Does vitamin D stop inpatients falling? A randomised controlled trial. <i>Age Ageing</i> . 2007;36(5):507-513. doi:10.1093/ageing/afm087.                                                                                                                                                 |
| 14 | Smith et al.            | 2007 | 1998 | UK                  | Smith H, Anderson F, Raphael H, Maslin P, Crozier S, Cooper C. Effect of annual intramuscular vitamin D on fracture risk in elderly men and women - A population-based, randomized, double-blind, placebo-controlled trial. <i>Rheumatology</i> . 2007;46(12):1852-1857. doi:10.1093/rheumatology/kem240.                 |
| 15 | Prince et al.           | 2008 | 2003 | Australia           | Prince RL, Austin N, Devine A, Dick IM, Bruce D, Zhu K. Effects of Ergocalciferol Added to Calcium on the Risk of Falls in Elderly High-Risk Women. <i>Arch Intern Med</i> . 2008;168(1):103. doi:10.1001/archinternmed.2007.31.                                                                                          |
| 16 | Pfeifer et al.          | 2009 | 2001 | Germany/<br>Austria | Pfeifer M, Begerow B, Minne HW, Suppan K, Fahrleitner-Pammer A, Dobnig H. Effects of a long-term vitamin D and calcium supplementation on falls and parameters of muscle function in community-dwelling older individuals. <i>Osteoporos Int</i> . 2009;20(2):315-322. doi:10.1007/s00198-008-0662-7.                     |
| 17 | Kärkkäinen et al.       | 2010 | 2003 | Finland             | Kärkkäinen MK, Tuppurainen M, Salovaara K, et al. Does daily vitamin D 800 IU and calcium 1000 mg supplementation decrease the risk of falling in ambulatory women aged 65-71 years? A 3-year randomized population-based trial (OSTPRE-FPS). <i>Maturitas</i> . 2010;65(4):359-365. doi:10.1016/j.maturitas.2009.12.018. |
| 18 | Sanders et al.          | 2010 | 2003 | Australia           | Sanders KM, Stuart AL, Williamson EJ, Simpson JA, Kotowicz MA, Young D et al. Annual high-dose oral vitamin D and falls and fractures in older women. <i>Jama</i> . 2010;303(18):1815-1822.                                                                                                                               |
| 19 | Glendenning et al.      | 2012 | 2009 | Australia           | Glendenning P, Zhu K, Inderjeeth C, Howat P, Lewis JR, Prince RL. Effects of three-monthly oral 150,000 IU cholecalciferol supplementation on falls, mobility, and muscle strength in older postmenopausal women: A randomized controlled trial. <i>J Bone Miner Res</i> . 2012;27(1):170-176. doi:10.1002/jbmr.524.      |

|    |                         |      |      |             |                                                                                                                                                                                                                                                                            |
|----|-------------------------|------|------|-------------|----------------------------------------------------------------------------------------------------------------------------------------------------------------------------------------------------------------------------------------------------------------------------|
| 20 | Law et al.              | 2006 | NR   | UK          | Law M, Withers H, Morris J, Anderson F. Vitamin D supplementation and the prevention of fractures and falls: Results of a randomised trial in elderly people in residential accommodation. <i>Age Ageing</i> . 2006;35(5):482-486. doi:10.1093/ageing/afj080.              |
| 21 | Bischoff-Ferrari et al. | 2016 | 2009 | Switzerland | Bischoff-Ferrari HA, Dawson-Hughes B, Orav EJ, et al. Monthly High-Dose Vitamin D Treatment for the Prevention of Functional Decline. <i>JAMA Intern Med</i> . 2016;176(2):175. doi:10.1001/jamainternmed.2015.7148                                                        |
| 22 | Uusi-Rasi et al.        | 2015 | 2010 | Finland     | Uusi-Rasi K, Patil R, Karinkanta S, et al. Exercise and Vitamin D in Fall Prevention Among Older Women. <i>JAMA Intern Med</i> . 2015;175(5):703. doi:10.1001/jamainternmed.2015.0225.                                                                                     |
| 23 | Dukas et al.            | 2004 | 2000 | Switzerland | Dukas L, Bischoff H, Lindpaintner LS, et al. Alfacalcidol Reduces the Number of Fallers in a Community- Dwelling Elderly Population with a Minimum Calcium Intake of More Than 500 Mg Daily. <i>Endocr Rev</i> . 2004;230-236.                                             |
| 24 | Gallagher et al.        | 2001 | NR   | USA         | Gallagher JC, Fowler SE, Detter JR, Sherman SS. Combination treatment with estrogen and calcitriol in the prevention of age-related bone loss. <i>J Clin Endocrinol Metab</i> . 2001;86(8):3618-3628. doi:10.1210/jc.86.8.3618.                                            |
| 25 | Cangussu et al.         | 2015 | 2013 | Brazil      | Cangussu LM, Nahas-Neto J, Orsatti CL, et al. Effect of isolated vitamin D supplementation on the rate of falls and postural balance in postmenopausal women fallers. <i>Menopause</i> . 2015;23(3):1. doi:10.1097/GME.0000000000000525.                                   |
| 26 | Wood et al.             | 2014 | 2009 | UK          | Wood AD, Secombes KR, Thies F, et al. A parallel group double-blind RCT of vitamin D3 assessing physical function: Is the biochemical response to treatment affected by overweight and obesity? <i>Osteoporos Int</i> . 2014;25(1):305-315. doi:10.1007/s00198-013-2473-8. |
| 27 | Ginde et al.            | 2017 | 2010 | USA         | Ginde AA, Blatchford P, Breese K, et al. High-Dose Monthly Vitamin D for Prevention of Acute Respiratory Infection in Older Long-Term Care Residents: A Randomized Clinical Trial. <i>J Am Geriatr Soc</i> . 2017;65(3):496-503. doi:10.1111/jgs.14679.                    |
| 28 | Houston et al.          | 2015 | 2010 | USA         | Houston DK, Tooze JA, Demons JL, et al. Delivery of a Vitamin D intervention in homebound older adults using a meals-on-wheels program: A pilot study. <i>J Am Geriatr Soc</i> . 2015;63(9):1861-1867. doi:10.1111/jgs.13610.                                              |
| 29 | Smith et al.            | 2017 | 2008 | USA         | Smith LM, Gallagher JC, Suiter C. Medium doses of daily vitamin D decrease falls and higher doses of daily vitamin D3 increase falls: A randomized clinical trial. <i>J Steroid Biochem Mol Biol</i> . 2017;173(March):317-322. doi:10.1016/j.jsbmb.2017.03.015.           |

|    |             |      |      |             |                                                                                                                                                                                                                                                                                                                              |
|----|-------------|------|------|-------------|------------------------------------------------------------------------------------------------------------------------------------------------------------------------------------------------------------------------------------------------------------------------------------------------------------------------------|
| 30 | Khaw et al. | 2017 | 2011 | New Zealand | Khaw KT, Stewart AW, Waayer D, et al. Effect of monthly high-dose vitamin D supplementation on falls and non-vertebral fractures: secondary and post-hoc outcomes from the randomised, double-blind, placebo-controlled ViDA trial. <i>Lancet Diabetes Endocrinol.</i> 2017;5(6):438-447. doi:10.1016/S2213-8587(17)30103-1. |
|----|-------------|------|------|-------------|------------------------------------------------------------------------------------------------------------------------------------------------------------------------------------------------------------------------------------------------------------------------------------------------------------------------------|

**Supplemental Table S2:** Trial recruitment and methodology characteristics

| Trial | N enrolled | Trial Design | % Women | Age                  |                  | Exclusion of VitD supplementation | Facilitated Living/ Care Facility | Prior falls/fracture as eligibility criteria | Description of randomization process | Blinding    |                  |
|-------|------------|--------------|---------|----------------------|------------------|-----------------------------------|-----------------------------------|----------------------------------------------|--------------------------------------|-------------|------------------|
|       |            |              |         | Eligibility Criteria | Mean or [Median] |                                   |                                   |                                              |                                      | Participant | Outcome Assessor |
| 1     | 368        | Parallel     | 85.0    | 70+                  | 51% >83          | None                              | Y                                 | Y                                            | NR                                   | Y           | NR               |
| 2     | 148        | Parallel     | 100.0   | 70+                  | 74.0             | All                               | N                                 | N                                            | NR                                   | Y           | Y                |
| 3     | 122        | Parallel     | 100.0   | 60+                  | 85.3             | None                              | Y                                 | N                                            | Y                                    | Y           | Y                |
| 4     | 243        | Factorial    | 53.0    | 65+                  | 79.1             | None                              | Y                                 | N                                            | Y                                    | Y           | Y                |
| 5     | 2686       | Parallel     | 24.2    | 65-85                | 74.8             | All                               | N                                 | N                                            | Y                                    | Y           | Y                |
| 6     | 139        | Parallel     | 77.7    | 65+                  | 76.8             | All                               | N                                 | Y                                            | Y                                    | Y           | Y                |
| 7     | 150        | Parallel     | 100.0   | NC                   | 81.2             | None                              | Y                                 | Y                                            | Y                                    | Y           | N                |
| 8     | 625        | Parallel     | 94.9    | NC                   | 83.5             | All                               | Y                                 | N                                            | Y                                    | Y           | Y                |
| 9     | 5292       | Factorial    | 85.0    | 70+                  | 77.0             | ≥200IU                            | N                                 | Y                                            | Y                                    | Y           | Y                |
| 10    | 3314       | Parallel     | 100.0   | 70+                  | 76.8             | None                              | N                                 | N                                            | Y                                    | NR          | NR               |
| 11    | 445        | Parallel     | 55.3    | 65+                  | 70.8             | None                              | N                                 | N                                            | Y                                    | Y           | Y                |
| 12    | 124        | Parallel     | 73.0    | NC                   | 89.0             | None                              | Y                                 | N                                            | Y                                    | Y           | Y                |
| 13    | 205        | Parallel     | 59.0    | 65+                  | [84]             | All                               | Y                                 | N                                            | Y                                    | Y           | Y                |
| 14    | 9440       | Parallel     | 53.9    | 75+                  | [79.1]           | ≥400IU                            | N                                 | N                                            | Y                                    | Y           | Y                |
| 15    | 302        | Parallel     | 100.0   | 70-90                | 77.2             | All                               | N                                 | Y                                            | Y                                    | Y           | Y                |
| 16    | 242        | Parallel     | 74.5    | 70+                  | 76.5             | All                               | N                                 | N                                            | NR                                   | Y           | Y                |
| 17    | 3139       | Parallel     | 100.0   | 65+                  | 67.4             | None                              | N                                 | N                                            | Y                                    | N           | N                |
| 18    | 2256       | Parallel     | 100.0   | 70+                  | [76]             | ≥400IU                            | N                                 | N                                            | Y                                    | Y           | Y                |
| 19    | 686        | Parallel     | 100.0   | 70+                  | 76.7             | All                               | N                                 | N                                            | Y                                    | Y           | Y                |
| 20    | 3717       | Parallel     | 76.0    | 60+                  | 85.0             | All                               | Y                                 | N                                            | Y                                    | N           | Y                |
| 21    | 200        | Parallel     | 67.0    | 70+                  | 78.0             | ≥800IU                            | N                                 | Y                                            | Y                                    | Y           | Y                |
| 22    | 409        | Factorial    | 100.0   | 70-80                | 74.2             | All                               | N                                 | Y                                            | Y                                    | Y           | Y                |
| 23    | 378        | Parallel     | 50.5    | 70+                  | 75.0             | ≥200IU                            | N                                 | Y                                            | Y                                    | Y           | Y                |
| 24    | 489        | Factorial    | 100.0   | 65-77                | 71.0             | None                              | N                                 | N                                            | Y                                    | Y           | Y                |
| 25    | 160        | Parallel     | 100.0   | 50-65                | 59.1             | All                               | N                                 | Y                                            | Y                                    | Y           | Y                |
| 26    | 305        | Parallel     | 100.0   | 60-70                | 63.8             | All                               | N                                 | N                                            | Y                                    | Y           | Y                |

|    |                                                  |                             |                                           |       |      |                                                        |                                                                         |                                                     |   |   |                                |
|----|--------------------------------------------------|-----------------------------|-------------------------------------------|-------|------|--------------------------------------------------------|-------------------------------------------------------------------------|-----------------------------------------------------|---|---|--------------------------------|
| 27 | 107                                              | Parallel                    | 57.9                                      | 60+   | 81.0 | ≥1000 IU                                               | Y                                                                       | N                                                   | Y | Y | Y                              |
| 28 | 68                                               | Parallel                    | 72.1                                      | 65+   | 77.9 | Any D2 or ≥1000 IU/day D3                              | N                                                                       | N                                                   | Y | Y | N                              |
| 29 | 273                                              | Parallel                    | 100.0                                     | 57-90 | 66.4 | All                                                    | N                                                                       | N                                                   | Y | Y | Y                              |
| 30 | 5110                                             | Parallel                    | 41.9                                      | 50-84 | 65.9 | ≥600 IU if 50-70 years old; ≥800 IU if 71-84 years old | N                                                                       | N                                                   | Y | Y | Y                              |
|    | Mean: 1371.4<br>Median: 336.5<br>IQR: 170-1863.5 | 86.7% were parallel designs | Mean: 80.3<br>Median: 85.0<br>IQR: 61-100 |       |      | 30.0% had no exclusion of Vitamin D supplementation    | 30.0% recruited participants from a facilitated/long term care facility | 30.0% recruited participants based on falls history |   |   | 76.7% reported double-blinding |

Y – Yes; N – No; NR – Not reported

**Supplemental Table S3:** Vitamin D assessment at baseline and follow-up

| Trial | Serum 25(OH)D Assessment |                          |                               |                         |
|-------|--------------------------|--------------------------|-------------------------------|-------------------------|
|       | Type of Assay            | Eligibility Criteria     | Baseline, mean [median] ng/mL | Assessment at Follow-up |
| 1     | NA                       | NA                       | NA                            | N                       |
| 2     | RIA                      | ≤ 50nmol/L = 20ng/mL     | 10.0*                         | Y                       |
| 3     | RIA                      | NC                       | [12]                          | Y                       |
| 4     | NR                       | NC                       | [17]                          | Y                       |
| 5     | NR                       | NC                       | NA                            | Y                       |
| 6     | RIA                      | ≤ 12ug/L = 12ng/mL       | 10.4                          | Y                       |
| 7     | RIA                      | NC                       | 11.7                          | Y                       |
| 8     | RIA                      | 25-90nmol/L = 10-36ng/mL | 89% < 24ng/mL <sup>†</sup>    | N                       |
| 9     | HPLC                     | NC                       | 15.2 <sup>‡</sup>             | Y                       |
| 10    | NR                       | NC                       | NA                            | N                       |
| 11    | PBA                      | NC                       | 29.5                          | Y                       |
| 12    | NR                       | NC                       | 19.5                          | Y                       |
| 13    | RIA                      | NC                       | 23.2                          | Y                       |
| 14    | RIA                      | NC                       | 22.6 <sup>‡</sup>             | Y                       |
| 15    | RIA                      | ≤ 24.0ng/mL              | 17.9                          | Y                       |
| 16    | RIA                      | ≤ 78nmol/L = 31.3ng/mL   | 21.8                          | Y                       |
| 17    | RIA                      | NC                       | 19.9 <sup>‡</sup>             | Y                       |
| 18    | RIA                      | NC                       | 19.6 <sup>§</sup>             | Y                       |
| 19    | RIA                      | NC                       | 26.4 <sup>‡</sup>             | Y                       |
| 20    | ELISA                    | NC                       | 18.8 <sup>‡</sup>             | Y                       |
| 21    | LC/MS/MS                 | NC                       | 19.3                          | Y                       |
| 22    | IEA                      | NC                       | 26.9                          | Y                       |
| 23    | RIA                      | NC                       | 2.6% < 12ng/mL <sup>†</sup>   | Y                       |
| 24    | PBA                      | NC                       | 31.6                          | Y                       |

|    |          |                                                                                  |      |                                     |
|----|----------|----------------------------------------------------------------------------------|------|-------------------------------------|
| 25 | HPLC     | NC                                                                               | 16.0 | Y                                   |
| 26 | LC/MS/MS | NC                                                                               | 13.5 | Y                                   |
| 27 | LC/MS/MS | <40ng/mL                                                                         | 23.0 | Y                                   |
| 28 | CLIA     | NC                                                                               | 20.9 | Y                                   |
| 29 | RIA      | <20ng/mL                                                                         | 14.6 | Y                                   |
| 30 | LC/MS/MS | NC                                                                               | 25.2 | Y                                   |
|    |          | 23.3% of trials had eligibility criteria based on baseline serum 25(OH)D levels. |      | 90.0% assessed 25(OH)D at follow-up |

Y – Yes; N- No; NC – Not a criterion; NA - not assessed; nmol/L measurements were converted to 1ng/mL with the conversion factor of 1ng/mL = 2.496nmol/L

Type of Assay: RIA - radioimmunoassay; PBA - protein-binding assay; NR - not reported; HPLC - high performance liquid chromatography; ELISA - enzyme-linked immunosorbent assay; IEA - immunoenzymatic assay; LC/MS/MS - liquid chromatography with tandem mass spectrometry; CLIA - chemiluminescent immunoassay (CLIA)

\* reported as 25.1nmol/mL, which is likely an error. Calculated based on 25.1nmol/L

† unclear mean/median

‡ analyzed in subset, reported as ng/mL in primary paper, but should have been nmol/L. Value reflects updated units.

§ weighted average of medians



**Supplemental Table S4:** Trial intervention and follow-up characteristics

| <b>Trial</b> | <b>Comparison Group</b> | <b>Concomitant calcium for comparison group</b> | <b>VitD Intervention</b> | <b>Dose</b> | <b>Concomitant Calcium</b> | <b>Mode of delivery</b> | <b>Frequency of VitD supplementation</b> | <b>Compliance Reporting</b> |
|--------------|-------------------------|-------------------------------------------------|--------------------------|-------------|----------------------------|-------------------------|------------------------------------------|-----------------------------|
| 1            | placebo                 | None                                            | D3                       | 400 IU      | None                       | po                      | daily                                    | N                           |
| 2            | placebo                 | 600mg                                           | D3                       | 800 IU      | 600mg                      | po                      | daily                                    | Y                           |
| 3            | placebo                 | 1200mg                                          | D3                       | 800 IU      | 1200mg                     | po                      | daily                                    | N*                          |
| 4            | placebo                 | None                                            | D2                       | 300,000 IU  | None                       | po                      | single dose                              | Y                           |
| 5            | placebo                 | None                                            | D3                       | 100,000 IU  | None                       | po                      | every 4 months                           | N                           |
| 6            | placebo                 | None                                            | D2                       | 600,000 IU  | None                       | im                      | single dose                              | N                           |
| 7            | no placebo              | None                                            | D2                       | 300,000 IU  | None                       | im                      | yearly                                   | N                           |
|              | no placebo              | None                                            | D2                       | 300,000 IU  | 1000mg                     | im                      | yearly                                   |                             |
|              | no placebo              | None                                            | D3                       | 800 IU      | 1000mg                     | po                      | daily                                    |                             |
| 8            | placebo                 | 600mg                                           | D2                       | 10,000 IU   | 600mg                      | po                      | weekly <sup>†</sup>                      | Y                           |
| 9            | placebo                 | None                                            | D3                       | 800 IU      | None                       | po                      | daily                                    | Y                           |
|              | placebo                 | 1000mg                                          | D3                       | 800 IU      | 1000mg                     | po                      | daily                                    |                             |
| 10           | no placebo              | None                                            | D3                       | 800 IU      | 1000mg                     | po                      | daily                                    | Y                           |
| 11           | placebo                 | None                                            | D3                       | 700 IU      | 500mg                      | po                      | daily                                    | Y                           |
| 12           | placebo                 | None                                            | D2                       | 200 IU      | None                       | po                      | daily                                    | Y                           |
|              | placebo                 | None                                            | D2                       | 400 IU      | None                       | po                      | daily                                    |                             |
|              | placebo                 | None                                            | D2                       | 600 IU      | None                       | po                      | daily                                    |                             |
|              | placebo                 | None                                            | D2                       | 800 IU      | None                       | po                      | daily                                    |                             |
| 13           | placebo                 | 1200mg                                          | D3                       | 800 IU      | 1200mg                     | po                      | daily                                    | Y                           |
| 14           | placebo                 | None                                            | D2                       | 300,000 IU  | None                       | im                      | yearly                                   | N                           |
| 15           | placebo                 | 1000mg                                          | D2                       | 1000 IU     | 1000mg                     | po                      | daily                                    | Y                           |
| 16           | placebo                 | 1000mg                                          | D3                       | 800 IU      | 1000mg                     | po                      | daily                                    | Y                           |
| 17           | no placebo              | None                                            | D3                       | 800 IU      | 1000mg                     | po                      | daily                                    | Y                           |
| 18           | placebo                 | None                                            | D3                       | 500,000 IU  | None                       | po                      | yearly                                   | Y                           |
| 19           | placebo                 | None                                            | D3                       | 150,000 IU  | None                       | po                      | every 3 months                           | Y                           |
| 20           | no placebo              | None                                            | D2                       | 2.5mg       | None                       | po                      | every 3 months                           | N                           |

|                 |                |                     |                  |                   |                                                         |                                                            |                                                       |   |
|-----------------|----------------|---------------------|------------------|-------------------|---------------------------------------------------------|------------------------------------------------------------|-------------------------------------------------------|---|
| 21              | 24,000 IU D3   | None                | D3               | 60,000 IU         | None                                                    | po                                                         | monthly                                               | Y |
|                 | 24,000 IU D3   | None                | D3 + calcifediol | 300,000 IU/300 ug | None                                                    | po                                                         | monthly*                                              |   |
| 22              | placebo        | None                | D3               | 800 IU            | None                                                    | po                                                         | daily                                                 | Y |
| 23              | placebo        | None                | alfacalcidol     | 1ug               | None                                                    | po                                                         | daily                                                 | N |
| 24              | placebo        | None                | calcitriol       | 0.25ug            | None                                                    | po                                                         | 2/day                                                 | Y |
|                 | ERT            | None                | calcitriol       | 0.25ug            | None                                                    | po                                                         | 2/day                                                 |   |
|                 | HRT            | None                | calcitriol       | 0.25ug            | None                                                    | po                                                         | 2/day                                                 |   |
| 25              | placebo        | None                | D3               | 1000 IU           | None                                                    | po                                                         | daily                                                 | Y |
| 26              | Placebo        | None                | D3               | 400 IU            | None                                                    | po                                                         | daily                                                 | Y |
|                 | Placebo        |                     |                  | 1000 IU           |                                                         | po                                                         | daily                                                 |   |
| 27 <sup>s</sup> | 12000 IU VitD3 | None                | D3               | 100,000 IU        | None                                                    | po                                                         | monthly                                               | N |
| 28              | 400IU Vit E    | None                | D3               | 100,000 IU        | None                                                    | po                                                         | monthly                                               | Y |
| 29              | Placebo        | Up to 1200-1400mg/d | D3               | 400 IU            | Up to 1200-1400mg/d total intake                        | po                                                         | daily                                                 | Y |
|                 | Placebo        |                     | D3               | 800 IU            |                                                         | po                                                         | daily                                                 |   |
|                 | Placebo        |                     | D3               | 1600 IU           |                                                         | po                                                         | daily                                                 |   |
|                 | Placebo        |                     | D3               | 2400 IU           |                                                         | po                                                         | daily                                                 |   |
|                 | Placebo        |                     | D3               | 3200 IU           |                                                         | po                                                         | daily                                                 |   |
|                 | Placebo        |                     | D3               | 4000 IU           |                                                         | po                                                         | daily                                                 |   |
|                 | Placebo        |                     | D3               | 4800 IU           |                                                         | po                                                         | daily                                                 |   |
| 30              | Placebo        | None                | D3               | 100,000 IU        | None                                                    | po                                                         | monthly                                               | Y |
|                 |                |                     |                  |                   | 28.3% of intervention arms included concomitant calcium | 91.3% of intervention arms used oral formulations of Vit D | 67.4% of intervention arms used daily supplementation |   |

Mode of delivery: po – oral; im- intramuscularly

\* supplementation administered by staff to ensure compliance, but rates not explicitly reported

† until Nov 1988, then 1,000 IU daily

\* 60,000 IU drink monthly + 2x1200 IU D3 pills/month + 300ug calcifediol/month

§ those already taking 400-1000 IU were randomized to 100,000 IU or placebo; those taking less than 400 IU/day were randomized to 100,000 monthly or 12,000 monthly; all continued usual supplementation

**Supplemental Table S5:** Outcome assessment and reporting characteristics

| Trial | Falls as primary outcome | Falls definition reporting | Primary Falls Ascertainment Method | Frequency of Recall             | Total Follow up Duration [Median/Mean]   | # persons who fell | Average Falls/Group | # persons with recurrent falls | time to first fall |
|-------|--------------------------|----------------------------|------------------------------------|---------------------------------|------------------------------------------|--------------------|---------------------|--------------------------------|--------------------|
| 1     | N                        | Y                          | Diary                              | at-event                        | 28 weeks                                 | Y                  | Y                   | Y                              | N                  |
| 2     | N                        | Y                          | Questionnaire                      | end of follow up                | 8-week intervention + 1 year follow up   | Y                  | Y                   | N                              | N                  |
| 3     | Y                        | Y                          | Nurse-report                       | at-event                        | 12 weeks                                 | Y                  | Y                   | Y                              | N                  |
| 4     | Y                        | N                          | Diary                              | at-event                        | 6 months                                 | Y                  | Y                   | N                              | Y                  |
| 5     | N                        | N                          | Questionnaire                      | yearly                          | 5 years                                  | Y                  | N                   | N                              | N                  |
| 6     | N                        | Y                          | Diary                              | at-event                        | 6 months                                 | Y                  | Y                   | N                              | N                  |
| 7     | Y                        | N                          | Interview                          | 3, 6, and 12 months             | 1 year                                   | Y                  | N                   | N                              | N                  |
| 8     | Y                        | Y                          | Nurse-report                       | at-event                        | 2 years                                  | Y                  | Y                   | N                              | Y                  |
| 9     | N                        | N                          | Questionnaire                      | every 4 months*                 | [45 months]                              | Y                  | Y                   | Y                              | Y                  |
| 10    | N                        | N                          | Questionnaire                      | 6 months                        | [25 months]                              | Y <sup>†</sup>     | N                   | N                              | N                  |
| 11    | N                        | Y                          | Postcards                          | at-event                        | 3 years                                  | Y                  | Y                   | Y                              | N                  |
| 12    | Y                        | Y                          | Nurse-report                       | at-event                        | 5 months                                 | Y                  | Y                   | Y                              | Y                  |
| 13    | Y                        | Y                          | Nurse-report                       | at-event                        | [30 days]                                | Y                  | Y                   | N                              | Y                  |
| 14    | N                        | N                          | Questionnaire/Interview            | every 6 months                  | 3 years                                  | Y                  | N                   | N                              | N                  |
| 15    | Y                        | Y                          | Interview                          | every 6 weeks                   | 1 year                                   | Y                  | N                   | Y                              | N                  |
| 16    | Y                        | Y                          | Diary                              | at-event                        | 1 year treatment + 8 months follow up    | Y                  | Y                   | N                              | Y                  |
| 17    | Y                        | Y                          | Interview                          | yearly (4 months for subsample) | 3 years                                  | Y                  | Y                   | Y                              | N                  |
| 18    | Y                        | Y                          | Postcards                          | at-event                        | 3-5 year intervention + 1 year follow up | Y                  | Y                   | Y                              | N                  |

|    |                                                       |                                               |                                            |                                          |             |                           |                                           |                                  |                                   |
|----|-------------------------------------------------------|-----------------------------------------------|--------------------------------------------|------------------------------------------|-------------|---------------------------|-------------------------------------------|----------------------------------|-----------------------------------|
| 19 | Y                                                     | Y                                             | Diary                                      | at-event                                 | 9 months    | Y                         | N                                         | Y                                | N                                 |
| 20 | Y                                                     | N                                             | Nurse-report                               | at-event                                 | [10 months] | Y                         | Y                                         | N                                | N                                 |
| 21 | N                                                     | Y                                             | Diary                                      | at-event                                 | 1 year      | Y                         | Y                                         | N                                | N                                 |
| 22 | Y                                                     | Y                                             | Diary                                      | at-event                                 | 2 years     | Y                         | Y                                         | Y                                | Y                                 |
| 23 | Y                                                     | Y                                             | Diary                                      | at-event                                 | 36 weeks    | Y                         | Y                                         | N                                | N                                 |
| 24 | N                                                     | N                                             | Interview                                  | 6 weeks, 3, 6, 12, 18, 24, 36 months     | 3 years     | Y                         | Y                                         | N                                | N                                 |
| 25 | Y                                                     | Y                                             | Interview                                  | end of follow-up                         | 9 months    | Y                         | N                                         | Y                                | N                                 |
| 26 | N                                                     | N                                             | Interview                                  | every 2 months                           | 1 year      | Y                         | N                                         | N                                | N                                 |
| 27 | N                                                     | N                                             | Chart Review                               | end of follow-up                         | 12 months   | Y                         | Y                                         | Y                                | Y                                 |
| 28 | Y                                                     | N                                             | Calendar                                   | at-event                                 | 5 months    | Y                         | Y                                         | N                                | N                                 |
| 29 | N                                                     | Y                                             | Interview                                  | every 3 months                           | 12 months   | Y                         | N                                         | N                                | N                                 |
| 30 | N                                                     | Y                                             | Questionnaire                              | monthly, then switched to every 4 months | [3.4 years] | Y                         | N                                         | Y                                | Y                                 |
|    | 56.7% of studies looked at falls as a primary outcome | 63.3% of studies reported definition of falls | 53.3% utilized at-event reporting of falls |                                          |             | 100.0% compared # fallers | 66.7% compared cumulative number of falls | 40.0% compared recurrent fallers | 30.0% compared time to first fall |

Y – Yes; N – No;

\* sent questionnaire every 4 months to ask if participant fell in the past week

† only reported OR at 6 months and 12 months
